# Supplementary material for: Fetal programming: Masculinization increases daughter lifetime reproduction at high competition
Source: Research Square preprint supplement (doi:10.21203/rs.3.rs-7435085/v1), 2025-09-26
Supplement: Supplementary file 1 [file 1c1ccba5b5d43e628dda4a61.docx]

# Descriptive statistics

Table 1: Descriptive statistics for the data used in this study. AGD (anogenital distance), weight (body weight) and tail length refer to measurements from 13-day-old female house mice. The season of birth denotes whether a female was born in spring (March to May), when population wide breeding activity and therefore reproductive competition is highest, in summer (June to August), when the adult population density is highest, autumn (September to November), or winter (December to February), when breeding activity is lowest. Population density denotes the number of male and female adults measured in the population during a ‘population monitoring’ event closest to the individual’s date of birth. Recruitment into the population indicates whether or not a female pup was measured again as adult (at above 17.5g body weight). Measurements with normal distribution are given as mean ± standard deviation (x̅ ± SD). Non-normally distributed measurements are given as median ± standard error (x̃ ± SE). Measurements are obtained from 4939 female 13-day-old pups living in a population of free-living house mice over the course of 13 years.

| **Sample set** | **All seasons combined** | **Season** | | | |
| --- | --- | --- | --- | --- | --- |
| **Spring** | **Summer** | **Autumn** | **Winter** |
| **Measurement** |  |  |  |  |  |
| **Across all females measured as pup (day 13)** |  |  |  |  |  |
| n | 4939 | 2199 | 1840 | 632 | 268 |
| AGD in mm  x̅ ± SD [range] | 3.1 ± 0.59  [1.6 – 5.8] | 3.1 ± 0.56  [1.6 – 5.6] | 3.2 ± 0. 6  [1.6 – 5.8] | 3.3 ± 0. 6  [1.7 – 5.8] | 3.0 ± 0.6  [1.6 – 4.9] |
| Weight in g  x̅ ± SD [range] | 6.0 ± 1.3  [2.2 – 10.8] | 6.0 ±1.2  [2.3 – 10.8] | 6.1 ± 1.3  [2.2 – 10.5] | 5.9 ± 1.2  [2.2 – 9.8] | 5.8 ± 1.2  [2.5 – 9.4] |
| Tail length in mm  x̅ ± SD [range] | 44.3 ± 5.5  [29 – 62] | 44.1 ± 5.3  [29 – 60] | 45.4 ± 5.7  [29 – 62] | 43.5 ± 5.3  [29 – 58] | 41.1 ± 4.9  [29 – 55] |
| Recruitment  yes/no; %yes | 2307/2632  47% | 1007/1192  46% | 755/1085  41% | 393/239  62% | 152/116  57% |
| Population density (adults) at birth x̅ ± SD [range] | 257 ± 109  [52 – 506] | 243 ± 96  [52 – 506] | 265 ± 125  [82 – 506] | 288 ± 98  [89 – 488] | 246 ± 102  [52 – 417] |
| **Across all females with hair samples** |  |  |  |  |  |
| Testosterone in pg/mg hair  x̃ ± SE [range]; n | 0.72 ± 0.02  [0.04 – 5.67]  799 | 0.77 ± 0.03  [0.04 – 5.67]  231 | 0.66 ± 0.02  [0.08 – 4.07]  385 | 0.78 ± 0.04  [0.15 –3.04]  110 | 1.02 ± 0.10  [0.16 – 4.88]  73 |
| Corticosterone in pg/mg hair  x̃ ± SE [range]; n | 43.4 ± 0.5  [14.6 – 189.2]  877 | 44.3 ± 1.1  [14.6 – 189.2]  243 | 43.5 ± 0.7  [23.1 – 109.4]  418 | 43.8 ± 1.1  [22.7 – 80.8]  136 | 42.5 ± 1.2  [24.2 – 81.5]  80 |
| Population density (adults) at hair sampling x̅ ± SD [range] | 369 ± 84  [207 – 506] | 357 ± 83  [207 – 506] | 370 ± 82  [252 – 506] | 418 ± 64  [252 – 462] | 320 ± 88  [207 – 462] |
| **Across recruited females** |  |  |  |  |  |
| n | 2307 | 1007 | 755 | 393 | 152 |
| Reproduction  yes/no; %yes | 1454/853  63% | 596/411  59% | 467/288  62% | 278/115  71% | 113/39  74% |
| **Across reproducing females** |  |  |  |  |  |
| n | 1454 | 596 | 467 | 278 | 113 |
| Number of offspring  x̃ ± SE [range] | 5 ± 0.13  [1 – 33] | 5 ± 0.18  [1 – 30] | 5 ± 0.24 [1 – 32] | 5 ± 0.40 [1 – 33] | 6 ± 0.59 [1 – 27] |
