# Supplementary material for: Fetal programming: Masculinization increases daughter lifetime reproduction at high competition
Source: Research Square preprint supplement (doi:10.21203/rs.3.rs-7435085/v1), 2025-09-26
Supplement: Supplementary file 2 [file 52feb58676cfd3817b94d917.docx]

# Model outputs for body weight-corrected AGD (AGD.weight)

## Hypothesis 2: Maternal exposure to reproductive competition during pregnancy increases daughter degree of masculinization

Model 2: Indices of reproductive competition at the date of birth (Density.DOB and Season.DOB) explaining the degree of masculinization for 13-day-old female house mice as indicated by the residualized anogenital distance corrected for body weight (AGD.weight). The genetic litter identity is included as random factor to account for a shared uterine environment. The identity of the genetic mother and father is included to account for parental influence in addition to the other factors. Data is derived from a population of free-living house mice and covers 13 years of monitoring.

| MODEL INFO:  *Observations:* 3803  *Dependent Variable:* **AGD.weight**  *Type:* Mixed effects linear regression  MODEL FIT:  *AIC* = 4366.321, *BIC* = 4422.513  *Pseudo-R² (fixed effects)* = 0.067  *Pseudo-R² (total)* = 0.621  FIXED EFFECTS:  -----------------------------------------------------------------------------  Est. 2.5% 97.5% t val. d.f. p  ---------------------- -------- -------- -------- -------- ---------- -------  (Intercept) 0.153 0.096 0.211 5.203 1137.568 0.000  Season.DOBsummer 0.180 0.136 0.224 8.055 1880.641 0.000  Season.DOBautumn 0.098 0.035 0.162 3.042 1937.206 0.002  Season.DOBwinter -0.023 -0.110 0.065 -0.507 1978.215 0.612  Density.DOB -0.001 -0.001 -0.001 -9.502 1143.668 0.000  -----------------------------------------------------------------------------  *p values calculated using Kenward-Roger standard errors and d.f.*  RANDOM EFFECTS:  -------------------------------------------------  Group Parameter Std. Dev.  ----------------------- ------------- -----------  Genetic_LitterID (Intercept) 0.301  dam_ID (Intercept) 0.081  sire_ID (Intercept) 0.192  Residual 0.303  -------------------------------------------------  Grouping variables:  ------------------------------------------  Group # groups ICC  ----------------------- ---------- -------  Genetic_LitterID 2120 0.401  dam_ID 1386 0.029  sire_ID 1194 0.163  ------------------------------------------ |
| --- |

## Hypothesis 3: Maternal testosterone and corticosterone during pregnancy increases daughter degree of masculinization

For 164 female pups measured at day 13, we had information on their mothers’ concentration of corticosterone (range = 23 to 107 pg/mg hair) and testosterone (range = 0.1 to 3.9 pg/mg hair) measured in hair representing the time of gestation.

Model 3: Maternal testosterone (A), corticosterone (B), and (C) their interactions predicting the degree of masculinization of 13-day-old female house mice as indexed by the residualized anogenital distance corrected for body weight (AGD.weight). The genetic litter identity is included as random factor to account for a shared uterine environment. Maternal and paternal identity had no additional influence in this reduced dataset and were therefore omitted. Data is derived from a population of free-living house mice and covers 4.5 years of monitoring.

| A) AGD.weight predicted by maternal testosterone  MODEL INFO:  *Observations:* 164  *Dependent Variable:* **AGD.weight**  *Type:* Mixed effects linear regression  MODEL FIT:  AIC = 35.234, BIC = 53.456  Pseudo-R² (fixed effects) = 0.038  Pseudo-R² (total) = 0.534  FIXED EFFECTS:  ----------------------------------------------------------------------  Est. 2.5% 97.5% t val. d.f. p  ----------------- -------- -------- -------- -------- -------- -------  (Intercept) -0.226 -0.326 -0.126 -4.333 74.400 0.000  motherTesto 0.096 -0.000 0.193 1.923 76.353 0.058  ---------------------------------------------------------------------  *p values calculated using Kenward-Roger standard errors and d.f.*  RANDOM EFFECTS:  -------------------------------------------------  Group Parameter Std. Dev.  ----------------------- ------------- -----------  sire_ID (Intercept) 0.000  Genetic_LitterID (Intercept) 0.191  dam_ID (Intercept) 0.042  Residual 0.190  -------------------------------------------------  Grouping variables:  ------------------------------------------  Group # groups ICC  ----------------------- ---------- -------  Genetic_LitterID 97 0.492  sire_ID 97 0.000  dam_ID 82 0.023  ------------------------------------------ |
| --- |
| B) AGD.weight predicted by maternal testosterone and corticosterone  MODEL INFO:  Observations: 154  Dependent Variable: **AGD.weight**  Type: Mixed effects linear regression  MODEL FIT:  AIC = 56.229, BIC = 80.525  Pseudo-R² (fixed effects) = 0.057  Pseudo-R² (total) = 0.550  FIXED EFFECTS:  ---------------------------------------------------------------------------------  Est. 2.5% 97.5% t val. d.f. p  ---------------------------- -------- -------- -------- -------- -------- -------  (Intercept) -0.587 -1.025 -0.148 -2.573 82.512 0.012  motherTesto 0.481 0.032 0.930 2.075 91.456 0.041  motherCort 0.007 -0.001 0.016 1.635 77.487 0.106  motherTesto:motherCort -0.008 -0.017 0.001 -1.691 86.416 0.094  ---------------------------------------------------------------------------------  p values calculated using Kenward-Roger standard errors and d.f.  RANDOM EFFECTS:  -------------------------------------------------  Group Parameter Std. Dev.  ----------------------- ------------- -----------  Genetic_LitterID (Intercept) 0.163  sire_ID (Intercept) 0.000  dam_ID (Intercept) 0.111  Residual 0.189  -------------------------------------------------  Grouping variables:  ------------------------------------------  Group # groups ICC  ----------------------- ---------- -------  Genetic_LitterID 97 0.357  sire_ID 97 0.000  dam_ID 82 0.165  ------------------------------------------ |

## Hypothesis 4: Masculinization enhances female fitness under high reproductive competition

### Lifetime reproductive success predicted by masculinization

Model 4: Lifetime reproductive success (number of offspring surviving to day 13) predicted by the degree of masculinization as indexed by the body weight-corrected anogenital distance (AGD.weight) measured at 13 days of age. Output from the conditional model refers to the number of offspring among reproducing females (n = 1454). Output from the zero-inflation model considers all females measured (n = 4939). Negative estimates of the zero-inflation model indicate reduced probability to have zero offspring (higher probability to have at least one offspring). Data is derived from a population of free-living house mice and covers 13 years of monitoring.

| Family: truncated_nbinom2 ( log )  Formula: **Offspring ~ AGD.weight**  Zero inflation: ~.  Data: tab.mod  AIC BIC logLik deviance df.resid  14034.0 14066.5 -7012.0 14024.0 4934  Dispersion parameter for truncated_nbinom2 family (): 1.68  Conditional model:  Estimate Std. Error z value Pr(>|z|)  (Intercept) 1.78146 0.02471 72.11 <2e-16 ***  AGD.weight 0.11397 0.04698 2.43 0.0153 *  ---  Signif. codes: 0 ‘***’ 0.001 ‘**’ 0.01 ‘*’ 0.05 ‘.’ 0.1 ‘ ’ 1  Zero-inflation model:  Estimate Std. Error z value Pr(>|z|)  (Intercept) 0.87421 0.03122 28.000 <2e-16 ***  AGD.weight 0.03158 0.06210 0.509 0.611  ---  Signif. codes: 0 ‘***’ 0.001 ‘**’ 0.01 ‘*’ 0.05 ‘.’ 0.1 ‘ ’ 1 |
| --- |

### Lifetime reproductive success predicted by masculinization and competition

Table 2: Comparing the fit of models that predict lifetime reproductive success by indicators of reproductive competition at the date of birth (Density.DOB and Season.DOB) and the degree of masculinization as indexed by the body weight-corrected anogenital distance (AGD.weight) measured at 13 days of age. Model fit is indicated by the Akaike Information Criterion (AIC). Lower numbers denote more explained variation (better model fit). A difference of ΔAIC > 2 indicates significant model improvement. The model summary of the best model is presented below.

| Lifetime reproductive success (# Offspring) predicted by AGD and reproductive competition | | |
| --- | --- | --- |
| Model # | Predictor variables | AIC |
| 0 | ~ 1 | 14036 |
| 1 | ~ AGD.weight | 14034 |
| 2 | ~ Season.DOB | 13937 |
| 3 | ~ Season.DOB + AGD.weight | 13937 |
| 3i | ~ Season.DOB + AGD.weight + Season.DOB : AGD.weight | 13942 |
| 4 | ~ Density.DOB | 13889 |
| 5 | ~ Density.DOB + AGD.weight | 13893 |
| 5i | ~ Density.DOB + AGD.weight + Density.DOB : AGD.weight | 13891 |
| **6** | **~ Density.DOB +** AGD.weight **+ Density.DOB :** AGD.weight **+   Season.DOB** | **13785** |
| 6i | ~ Density.DOB + AGD.weight + Density.DOB : AGD.weight +   Season.DOB + Season.DOB : AGD | 13791 |

Model 5: Lifetime reproductive success (number of offspring surviving to day 13) predicted by indicators of reproductive competition at the date of birth (Density.DOB and Season.DOB) and the degree of masculinization as indexed by the body weight-corrected anogenital distance (AGD.weight) measured at 13 days of age. Data is derived from a population of free-living house mice and covers 13 years of monitoring. Output from the conditional model refers to the number of offspring among reproducing females (n = 1454). Output from the zero-inflation model considers all females measured as pups (n = 4939). Negative estimates of the zero-inflation model indicate enhanced probability to have at least one offspring (lower probability to have zero offspring).

| Family: truncated_nbinom2 ( log )  Formula: **Offspring ~ Density.DOB * AGD.weight + Season.DOB**  Zero inflation: ~.  Data: tab.mod  AIC BIC logLik deviance df.resid  13785.1 13882.7 -6877.5 13755.1 4924  Dispersion parameter for truncated_nbinom2 family (): 2.12  Conditional model:  Estimate Std. Error z value Pr(>|z|)  (Intercept) 2.3889513 0.0653235 36.57 < 2e-16 ***  Density.DOB -0.0028147 0.0002264 -12.43 < 2e-16 ***  AGD.weight 0.0989186 0.1168374 0.85 0.397199  Season.DOBsummer 0.1850791 0.0517640 3.58 0.000350 ***  Season.DOBautumn 0.2305762 0.0597422 3.86 0.000114 ***  Season.DOBwinter 0.0878591 0.0843436 1.04 0.297560  Density.DOB:AGD.weight -0.0005878 0.0005090 -1.15 0.248125  ---  Signif. codes: 0 ‘***’ 0.001 ‘**’ 0.01 ‘*’ 0.05 ‘.’ 0.1 ‘ ’ 1  Zero-inflation model:  Estimate Std. Error z value Pr(>|z|)  (Intercept) 1.1115248 0.0878328 12.655 < 2e-16 ***  Density.DOB -0.0005796 0.0003028 -1.914 0.0556 .  AGD.weight 0.3025636 0.1560327 1.939 0.0525 .  Season.DOBsummer 0.1098447 0.0736241 1.492 0.1357  Season.DOBautumn -0.7191183 0.0945450 -7.606 2.83e-14 ***  Season.DOBwinter -0.6769659 0.1328624 -5.095 3.48e-07 ***  Density.DOB:AGD.weight -0.0015559 0.0006584 -2.363 0.0181 *  ---  Signif. codes: 0 ‘***’ 0.001 ‘**’ 0.01 ‘*’ 0.05 ‘.’ 0.1 ‘ ’ 1 |
| --- |

### Recruitment predicted by masculinization and competition

Table 3: Comparing the fit of models that predict a female pup’s probability to be recruited into the adult population by indicators of reproductive competition at the date of birth (Density.DOB and Season.DOB) alone or in interaction with the degree of masculinization as indexed by the body weight-corrected anogenital distance (AGD.weight) measured at 13 days of age. The goodness of model fit is indicated by the Akaike Information Criterion (AIC). Lower numbers denote more explained variation (better model fit). A difference of ΔAIC > 2 indicates significant model improvement. The model summary of the best model is presented below.

| Recruitment (no = 0, yes = 1) | | |
| --- | --- | --- |
| Model # | Predictor variables | AIC |
| 0 | ~ 1 | 6828 |
| 1 | ~ AGD.weight | 6827 |
| 2 | ~ Season.DOB | 6737 |
| 3 | ~ Season.DOB + AGD.weight. | 6738 |
| 3i | ~ Season.DOB + AGD.weight + Season.DOB : AGD.weight | 6742 |
| 4 | ~ Density.DOB | 6771 |
| 5 | ~ Density.DOB + AGD.weight | 6773 |
| 5i | ~ Density.DOB + AGD.weight + Density.DOB : AGD | 6769 |
| **6** | **~ Density.DOB + AGD.weight + Density.DOB :** AGD.weight **+   Season.DOB** | **6685** |
| 6i | ~ Density.DOB + AGD.weight + Density.DOB : AGD.weight +   Season.DOB + Season.DOB : AGD.weight | 6687 |

Model 6: Probability of a female pup to be recruited into the adult population as predicted by indicators of reproductive competition at the date of birth (Density.DOB and Season.DOB) and the degree of masculinization as indexed by the body weight-corrected anogenital distance (AGD.weight) measured at 13 days of age. Data is derived from a population of free-living house mice and covers 13 years of monitoring.

| glm(formula = **recruitment ~ Density.DOB * AGD.weight + Season.DOB**,  family = binomial, data = tab.mod)  Coefficients:  Estimate Std. Error z value Pr(>|z|)  (Intercept) -0.6346312 0.0796207 -7.971 1.58e-15 ***  Density.DOB 0.0019967 0.0002770 7.209 5.66e-13 ***  AGD.weight -0.2757660 0.1412419 -1.952 0.050886 .  Season.DOBsummer -0.2525680 0.0658730 -3.834 0.000126 ***  Season.DOBautumn 0.5779496 0.0937303 6.166 7.00e-10 ***  Season.DOBwinter 0.4417978 0.1313101 3.365 0.000767 ***  Density.DOB:AGD.weight 0.0015054 0.0006009 2.505 0.012240 *  ---  Signif. codes: 0 ‘***’ 0.001 ‘**’ 0.01 ‘*’ 0.05 ‘.’ 0.1 ‘ ’ 1  (Dispersion parameter for binomial family taken to be 1)  Null deviance: 6825.5 on 4938 degrees of freedom  Residual deviance: 6669.8 on 4932 degrees of freedom  AIC: 6683.8  Number of Fisher Scoring iterations: 4 |
| --- |
