# Supplementary material for: Fetal programming: Masculinization increases daughter lifetime reproduction at high competition
Source: Research Square preprint supplement (doi:10.21203/rs.3.rs-7435085/v1), 2025-09-26
Supplement: Supplementary file 3 [file ee22a9473fd20ef6379b160c.docx]

# Model outputs for tail length-corrected AGD (AGD.tail)

## Hypothesis 1: Reproductive competitionincreases adult female corticosterone and testosterone

Model 1: Indicators of reproductive competition (density and season) explaining (A) corticosterone and (B) testosterone concentration of adult females. Hormones were measured in the hair of females older than 90 days of age. The predictor variables age, season, and density refer to the date at hair sampling. Seasons are contrasted against hair samples representing spring. The response variables corticosterone and testosterone were log transformed to account for the negative skewness of data. Testosterone concentrations below the detection limit of 0.01 pg/mg hair were excluded from the analysis (Gao et al., 2013). Data is derived from a population of free-living house mice and covers 4.5 years of monitoring.

| A) Corticosterone  MODEL INFO:  *Observations:* 553  *Dependent Variable:* **log(Corticosterone)**  *Type:* Mixed effects linear regression  MODEL FIT:  *AIC* = 230.348, *BIC* = 264.871  *Pseudo-R² (fixed effects)* = 0.136  *Pseudo-R² (total)* = 0.296  FIXED EFFECTS:  ------------------------------------------------------------------------  Est. 2.5% 97.5% t val. d.f. p  ------------------ -------- -------- -------- -------- --------- -------  (Intercept) 3.863 3.731 3.994 57.351 526.368 0.000  Age 0.001 0.001 0.001 8.358 544.075 0.000  SeasonSummer 0.012 -0.051 0.075 0.372 473.658 0.710  SeasonAutumn -0.027 -0.101 0.046 -0.731 507.480 0.465  SeasonWinter -0.090 -0.175 -0.005 -2.079 546.267 0.038  Density -0.001 -0.001 -0.000 -3.452 496.957 0.001  ------------------------------------------------------------------------  *p values calculated using Kenward-Roger standard errors and d.f.*  RANDOM EFFECTS:  ------------------------------------  Group Parameter Std. Dev.  ---------- ------------- -----------  focal_ID (Intercept) 0.121  Residual 0.255  ------------------------------------  Grouping variables:  -----------------------------  Group # groups ICC  ---------- ---------- -------  focal_ID 445 0.185  ----------------------------- |
| --- |
| B) Testosterone  MODEL INFO:  *Observations:* 510  *Dependent Variable:* **log(Testosterone)**  *Type:* Mixed effects linear regression  MODEL FIT:  *AIC* = 845.494, *BIC* = 879.369  *Pseudo-R² (fixed effects)* = 0.047  *Pseudo-R² (total)* = 0.195  FIXED EFFECTS:  ------------------------------------------------------------------------  Est. 2.5% 97.5% t val. d.f. p  ------------------ -------- -------- -------- -------- --------- -------  (Intercept) -0.020 -0.270 0.231 -0.152 478.851 0.879  Age 0.000 -0.000 0.001 1.268 501.055 0.205  SeasonSummer -0.099 -0.220 0.022 -1.591 445.238 0.112  SeasonAutumn -0.014 -0.161 0.134 -0.181 486.353 0.856  SeasonWinter 0.153 -0.009 0.315 1.842 503.736 0.066  Density -0.001 -0.001 -0.000 -2.493 454.275 0.013  ------------------------------------------------------------------------  *p values calculated using Kenward-Roger standard errors and d.f.*  RANDOM EFFECTS:  ------------------------------------  Group Parameter Std. Dev.  ---------- ------------- -----------  focal_ID (Intercept) 0.207  Residual 0.483  ------------------------------------  Grouping variables:  -----------------------------  Group # groups ICC  ---------- ---------- -------  focal_ID 415 0.156  ----------------------------- |

## Hypothesis 2: Maternal exposure to reproductive competition during pregnancy increases daughter degree of masculinization

Model 2: Indices of reproductive competition at the date of birth (Density.DOB and Season.DOB) explaining the degree of masculinization for 13-day-old female house mice as indicated by the residualized anogenital distance corrected for tail length (AGD.tail). The genetic litter identity is included as random factor to account for a shared uterine environment. The identity of the genetic mother and father is included to account for parental influence in addition to the other factors. Data is derived from a population of free-living house mice and covers 13 years of monitoring.

| MODEL INFO:  *Observations:* 3803  *Dependent Variable:* **AGD.tail**  *Type:* Mixed effects linear regression  MODEL FIT:  *AIC* = 4232.468, *BIC* = 4288.660  *Pseudo-R² (fixed effects)* = 0.039  *Pseudo-R² (total)* = 0.570  FIXED EFFECTS:  -----------------------------------------------------------------------------  Est. 2.5% 97.5% t val. d.f. p  ---------------------- -------- -------- -------- -------- ---------- -------  (Intercept) 0.144 0.087 0.201 4.963 1198.398 0.000  Season.DOBsummer 0.094 0.052 0.136 4.406 1867.945 0.000  Season.DOBautumn 0.091 0.030 0.152 2.927 1921.702 0.003  Season.DOBwinter 0.084 0.001 0.168 1.980 1952.967 0.048  Density.DOB -0.001 -0.001 -0.001 -7.992 1211.785 0.000  -----------------------------------------------------------------------------  *p values calculated using Kenward-Roger standard errors and d.f.*  RANDOM EFFECTS:  -------------------------------------------------  Group Parameter Std. Dev.  ----------------------- ------------- -----------  Genetic_LitterID (Intercept) 0.253  dam_ID (Intercept) 0.109  sire_ID (Intercept) 0.205  Residual 0.309  -------------------------------------------------  Grouping variables:  ------------------------------------------  Group # groups ICC  ----------------------- ---------- -------  Genetic_LitterID 2120 0.300  dam_ID 1386 0.056  sire_ID 1194 0.197  ------------------------------------------ |
| --- |
|  |

## Hypothesis 3: Maternal testosterone and corticosterone during pregnancy increases daughter degree of masculinization

For 164 female pups measured at day 13, we had information on their mothers’ concentration of corticosterone (range = 23 to 107 pg/mg hair) and testosterone (range = 0.1 to 3.9 pg/mg hair) measured in hair representing the time of gestation.

Model 3: Maternal testosterone (A), corticosterone (B), and (C) their interaction predicting the degree of masculinization of 13-day-old female house mice as indexed by the residualized anogenital distance corrected for tail length (AGD.tail). The genetic litter identity is included as random factor to account for a shared uterine environment. Maternal and paternal identity had no additional influence in this reduced dataset and were therefore omitted. Data is derived from a population of free-living house mice and covers 4.5 years of monitoring.

| A) AGD.tail predicted by maternal testosterone  MODEL INFO:  Observations: 154  Dependent Variable: **AGD.tail**  Type: Mixed effects linear regression  MODEL FIT:  AIC = 7.773, BIC = 25.995  Pseudo-R² (fixed effects) = 0.084  Pseudo-R² (total) = 0.475  FIXED EFFECTS:  ----------------------------------------------------------------------  Est. 2.5% 97.5% t val. d.f. p  ----------------- -------- -------- -------- -------- -------- -------  (Intercept) -0.234 -0.320 -0.148 -5.177 70.006 0.000  motherTesto 0.131 0.047 0.214 3.024 70.143 0.003  ----------------------------------------------------------------------  p values calculated using Kenward-Roger standard errors and  d.f.  RANDOM EFFECTS:  -------------------------------------------------  Group Parameter Std. Dev.  ----------------------- ------------- -----------  Genetic_LitterID (Intercept) 0.149  sire_ID (Intercept) 0.053  dam_ID (Intercept) 0.000  Residual 0.184  -------------------------------------------------  Grouping variables:  ------------------------------------------  Group # groups ICC  ----------------------- ---------- -------  Genetic_LitterID 97 0.380  sire_ID 97 0.048  dam_ID 82 0.000  ------------------------------------------ |
| --- |
| B) AGD.tail predicted by maternal corticosterone  MODEL INFO:  Observations: 162  Dependent Variable: **AGD.tail**  Type: Mixed effects linear regression  MODEL FIT:  AIC = 21.702, BIC = 40.227  Pseudo-R² (fixed effects) = 0.004  Pseudo-R² (total) = 0.470  FIXED EFFECTS:  ---------------------------------------------------------------------  Est. 2.5% 97.5% t val. d.f. p  ----------------- -------- -------- ------- -------- -------- -------  (Intercept) -0.067 -0.225 0.091 -0.808 79.040 0.422  motherCort -0.001 -0.004 0.002 -0.641 77.972 0.523  ---------------------------------------------------------------------  p values calculated using Kenward-Roger standard errors and  d.f.  RANDOM EFFECTS:  -------------------------------------------------  Group Parameter Std. Dev.  ----------------------- ------------- -----------  Genetic_LitterID (Intercept) 0.172  sire_ID (Intercept) 0.009  dam_ID (Intercept) 0.000  Residual 0.184  -------------------------------------------------  Grouping variables:  ------------------------------------------  Group # groups ICC  ----------------------- ---------- -------  Genetic_LitterID 101 0.467  sire_ID 100 0.001  dam_ID 85 0.000  ------------------------------------------ |
| C) AGD.tail predicted by the interaction of maternal testosterone and corticosterone  MODEL INFO:  Observations: 154  Dependent Variable: **AGD.tail**  Type: Mixed effects linear regression  MODEL FIT:  AIC = 24.753, BIC = 49.049  Pseudo-R² (fixed effects) = 0.127  Pseudo-R² (total) = 0.501  FIXED EFFECTS:  ---------------------------------------------------------------------------------  Est. 2.5% 97.5% t val. d.f. p  ---------------------------- -------- -------- -------- -------- -------- -------  (Intercept) -0.597 -0.969 -0.225 -3.074 81.044 0.003  motherTesto 0.625 0.241 1.009 3.141 93.373 0.002  motherCort 0.008 0.000 0.015 1.950 74.584 0.055  motherTesto:motherCort -0.010 -0.018 -0.002 -2.532 87.646 0.013  ---------------------------------------------------------------------------------  p values calculated using Kenward-Roger standard errors and d.f.  RANDOM EFFECTS:  -------------------------------------------------  Group Parameter Std. Dev.  ----------------------- ------------- -----------  Genetic_LitterID (Intercept) 0.146  sire_ID (Intercept) 0.056  dam_ID (Intercept) 0.000  Residual 0.180  -------------------------------------------------  Grouping variables:  ------------------------------------------  Group # groups ICC  ----------------------- ---------- -------  Genetic_LitterID 97 0.375  sire_ID 97 0.055  dam_ID 82 0.000  ------------------------------------------ |

## Hypothesis 4: Masculinization enhances female fitness under high reproductive competition

### Lifetime reproductive success predicted by masculinization

Model 4: Lifetime reproductive success (number of offspring surviving to day 13) predicted by the degree of masculinization as indexed by the tail length-corrected anogenital distance (AGD.tail) measured at 13 days of age. Output from the conditional model refers to the number of offspring among reproducing females (n = 1454). Output from the zero-inflation model considers all females measured (n = 4939). Negative estimates of the zero-inflation model indicate reduced probability to have zero offspring (higher probability to have at least one offspring). Data is derived from a population of free-living house mice and covers 13 years of monitoring.

| Family: truncated_nbinom2 ( log )  Formula: **life.repro.success ~ AGD.tail**  Zero inflation: ~.  Data: tab.mod  AIC BIC logLik deviance df.resid  14030.5 14063.0 -7010.2 14020.5 4934  Dispersion parameter for truncated_nbinom2 family (): 1.69  Conditional model:  Estimate Std. Error z value Pr(>|z|)  (Intercept) 1.77997 0.02465 72.20 < 2e-16 ***  AGD.tail 0.14903 0.04817 3.09 0.00198 **  ---  Signif. codes: 0 ‘***’ 0.001 ‘**’ 0.01 ‘*’ 0.05 ‘.’ 0.1 ‘ ’ 1  Zero-inflation model:  Estimate Std. Error z value Pr(>|z|)  (Intercept) 0.87417 0.03122 28.000 <2e-16 ***  AGD.tail -0.01943 0.06426 -0.302 0.762  ---  Signif. codes: 0 ‘***’ 0.001 ‘**’ 0.01 ‘*’ 0.05 ‘.’ 0.1 ‘ ’ 1 |
| --- |

### Lifetime reproductive success predicted by masculinization and competition

Table 2: Comparing the fit of models that predict lifetime reproductive success by indicators of reproductive competition (density and season at date of birth, DOB) alone or in interaction with the degree of masculinization as indexed by the tail length-corrected anogenital distance (AGD.tail) measured at 13 days of age. Model fit is indicated by the Akaike Information Criterion (AIC). Lower numbers denote more explained variation (better model fit). A difference of ΔAIC > 2 indicates significant model improvement. The model summary of the best model is presented below.

| Lifetime reproductive success (# Offspring) predicted by  masculinization and competition | | |
| --- | --- | --- |
| Model # | Predictor variables | AIC |
| 0 | ~ 1 | 14036 |
| 1 | ~ AGD.tail | 14030 |
| 2 | ~ Season.DOB | 13937 |
| 3 | ~ Season.DOB + AGD.tail | 13933 |
| 3i | ~ Season.DOB + AGD.tail + Season.DOB : AGD.tail | 13939 |
| 4 | ~ Density.DOB | 13889 |
| 5 | ~ Density.DOB + AGD.tail | 13891 |
| 5i | ~ Density.DOB + AGD.tail + Density.DOB : AGD.tail | 13882 |
| **6** | **~ Density.DOB + AGD.tail + Density.DOB : AGD.tail +   Season.DOB** | **13780** |
| 6i | ~ Density.DOB + AGD.tail + Density.DOB : AGD.tail +   Season.DOB + Season.DOB : AGD.tail | 13787 |

Model 5: Lifetime reproductive success (number of offspring surviving to day 13) predicted by indicators of reproductive competition at date of birth (Density.DOB and Season.DOB) and the degree of masculinization as indexed by the tail length-corrected anogenital distance (AGD.tail) measured at 13 days of age. Data is derived from a population of free-living house mice and covers 13 years of monitoring. Output from the conditional model refers to the number of offspring among reproducing females (n = 1454). Output from the zero-inflation model considers all females measured as pups (n = 4939). Negative estimates of the zero-inflation model indicate enhanced probability to have at least one offspring (lower probability to have zero offspring).

| Family: truncated_nbinom2 ( log )  Formula: **Offspring ~ Density.DOB * AGD.tail + Season.DOB**  Zero inflation: ~.  Data: tab.mod  AIC BIC logLik deviance df.resid  13779.9 13877.5 -6875.0 13749.9 4924  Dispersion parameter for truncated_nbinom2 family (): 2.12  Conditional model:  Estimate Std. Error z value Pr(>|z|)  (Intercept) 2.3736948 0.0652483 36.38 < 2e-16 ***  Density.DOB -0.0027440 0.0002251 -12.19 < 2e-16 ***  AGD.tail 0.2123915 0.1170865 1.81 0.069682 .  Season.DOBsummer 0.1733410 0.0511825 3.39 0.000707 ***  Season.DOBautumn 0.2307337 0.0597782 3.86 0.000113 ***  Season.DOBwinter 0.0897405 0.0843148 1.06 0.287170  Density.DOB:AGD.tail -0.0008770 0.0005241 -1.67 0.094247 .  ---  Signif. codes: 0 ‘***’ 0.001 ‘**’ 0.01 ‘*’ 0.05 ‘.’ 0.1 ‘ ’ 1  Zero-inflation model:  Estimate Std. Error z value Pr(>|z|)  (Intercept) 1.1080547 0.0878923 12.607 < 2e-16 ***  Density.DOB -0.0005619 0.0003012 -1.865 0.06213 .  AGD.tail 0.3830206 0.1600498 2.393 0.01671 *  Season.DOBsummer 0.1003648 0.0728597 1.378 0.16836  Season.DOBautumn -0.7147199 0.0945389 -7.560 4.03e-14 ***  Season.DOBwinter -0.6660602 0.1331477 -5.002 5.66e-07 ***  Density.DOB:AGD.tail -0.0020191 0.0006836 -2.954 0.00314 **  ---  Signif. codes: 0 ‘***’ 0.001 ‘**’ 0.01 ‘*’ 0.05 ‘.’ 0.1 ‘ ’ 1 |
| --- |

### Recruitment predicted by masculinization and competition

Table 3: Comparing the fit of models that predict a female pup’s probability to be recruited into the adult population by indicators of reproductive competition (density and season at date of birth, DOB) alone or in interaction with the degree of masculinization as indexed by the tail length-corrected anogenital distance (AGD.tail) measured at 13 days of age. The goodness of model fit is indicated by the Akaike Information Criterion (AIC). Lower numbers denote more explained variation (better model fit). A difference of ΔAIC > 2 indicates significant model improvement. The model summary of the best model is presented below.

| Recruitment (no = 0, yes = 1) | | |
| --- | --- | --- |
| Model # | Predictor variables | AIC |
| 0 | ~ 1 | 6828 |
| 1 | ~ AGD.tail | 6829 |
| 2 | ~ Season.DOB | 6737 |
| 3 | ~ Season.DOB + AGD.tail. | 6739 |
| 3i | ~ Season.DOB + AGD.tail + Season.DOB : AGD.tail | 6743 |
| 4 | ~ Density.DOB | 6771 |
| 5 | ~ Density.DOB + AGD.tail | 6771 |
| 5i | ~ Density.DOB + AGD.tail + Density.DOB : AGD | 6756 |
| **6** | **~ Density.DOB + AGD.tail + Density.DOB : AGD.tail +   Season.DOB** | **6674** |
| **6i** | ~ Density.DOB + AGD.tail + Density.DOB : AGD.tail +   Season.DOB + Season.DOB : AGD.tail | **6678** |

Model 6: Probability of a female pup to be recruited into the adult population as predicted by indicators of reproductive competition at date of birth (Density.DOB and Season.DOB) and the degree of masculinization as indexed by the tail length-corrected anogenital distance (AGD.tail) measured at 13 days of age. Data is derived from a population of free-living house mice and covers 13 years of monitoring. Recruited females were assigned 1 as compared to 0 for non-recruited females.

| Recruitment (yes = 1, no = 0) |
| --- |
| glm(formula = recruitment.y.n ~ Density.DOB * AGD.tail + Season.DOB,  family = binomial, data = tab.mod)  Coefficients:  Estimate Std. Error z value Pr(>|z|)  (Intercept) -0.6366602 0.0796312 -7.995 1.29e-15 ***  Density.DOB 0.0020233 0.0002757 7.339 2.16e-13 ***  AGD.tail -0.3940866 0.1445812 -2.726 0.006416 **  Season.DOBsummer -0.2455187 0.0652012 -3.766 0.000166 ***  Season.DOBautumn 0.5702091 0.0937991 6.079 1.21e-09 ***  Season.DOBwinter 0.4268803 0.1318022 3.239 0.001200 **  Density.DOB:AGD.tail 0.0023212 0.0006231 3.725 0.000195 ***  ---  Signif. codes: 0 ‘***’ 0.001 ‘**’ 0.01 ‘*’ 0.05 ‘.’ 0.1 ‘ ’ 1  (Dispersion parameter for binomial family taken to be 1)  Null deviance: 6825.5 on 4938 degrees of freedom  Residual deviance: 6660.3 on 4932 degrees of freedom  AIC: 6674.3  Number of Fisher Scoring iterations: 4 |
